# Supplementary material for: A sustainable and efficient method for sequential extraction of lutein and lipid from deep eutectic solvent pretreated Chlorella pyrenoidosa
Source: Royal Society of Chemistry journal article supplement (doi:10.1039/d5ra00423c), 2025-01-01
Supplement: d5ra00423c1.pdf [file d5ra00423c1.pdf]

## Supplementary data

### **Sustainable and efficient method for sequential extraction of lutein and lipids from deep eutectic solvent pretreated *Chlorella pyrenoidosa***

Beixiao Zhang<sup>#a\*</sup>, Gul Muhammad<sup>#a,b,c\*</sup>, Liya Deng<sup>a</sup>, Md Asraful Alam<sup>a</sup>, Anqi Zhao<sup>d</sup>, Thomas O. Butler<sup>e</sup>, Zhenglong Li<sup>b,c</sup>, Ximing Zhang<sup>b,c\*</sup>, Jingliang Xu<sup>a\*</sup>

<sup>a</sup> School of Chemical Engineering, Zhengzhou University, Zhengzhou 450001, China

<sup>b</sup> College of Biosystems Engineering and Food Science, Zhejiang University, Hangzhou 310058, China

<sup>c</sup> Institute of Zhejiang University-Quzhou, Quzhou 324000, China

<sup>d</sup> School of Life Sciences, Zhengzhou University, Zhengzhou 450001, Henan, China.

<sup>e</sup> Lgem/Synalgae, Achterweg 65, 1424 PP, De Kwakel, The Netherlands

\*Corresponding authors: bxzhang@zzu.edu.cn; gulmuhammad@zju-qz.edu.cn; zhangximing@zju.edu.cn; xujl@zzu.edu.cn

#Both authors contributed equally and will be regarded as 1st co-author

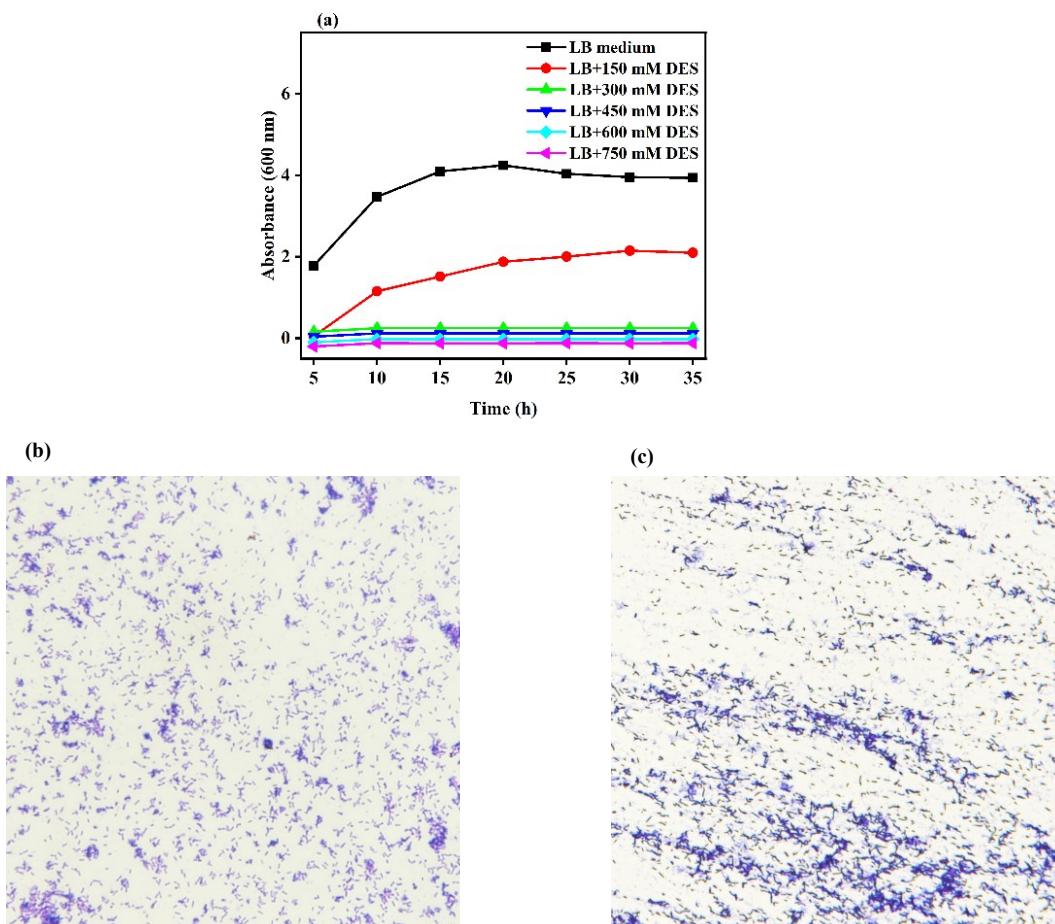

**Fig. S1** (a) The cell growth curve of *E. coli* in different media with different supplementary of DES; (b) Staining plot of *E. coli* cells in LB medium under a microscope; (c) Staining plot of *E. coli* cells in LB medium with supplementary of 150 mM DES under a microscope.
